# Supplementary material for: Intermediate-Type Vancomycin Resistance (VISA) in Genetically-Distinct Staphylococcus aureus Isolates Is Linked to Specific, Reversible Metabolic Alterations
Source: PLoS One. 2014 May 9;9(5):e97137. doi: 10.1371/journal.pone.0097137 (PMC4016254; doi:10.1371/journal.pone.0097137)
Supplement: Table S1 — List and characteristics of the 164 “core” metabolites (including 72 identified) in isolates SG-S, SG-R and SG-rev. Superscript (a) denotes Retention Time (RT), (b) denotes Positive Mode (POS) versus Negative Mode (NEG), (c) denotes Molecular Feature Extraction (MFE), which extracts chromatographic peaks by molecular features versus Find by Formula (FBF) which extracts peaks by chemical formula. Superscript (d) denotes metabolites confirmed by chemical standard (stnd). All other identifications are provisional identifications made by matching against a database of accurate mass-retention time pairs (mass-matching, MM), (e) denotes univariate statistical analysis of changes (> 0.25 – fold) in mean intracellular abundance by hierarchical modeling, adjusted by Benjamini-Hochberg procedure, (f) denotes bivariate analysis of changes (> 0.25 – fold) in intracellular abundance and variance by hierarchical modeling, adjusted by Benjamini-Hochberg procedure. Significance analysis of microarrays (SAM) analysis of changes in intracellular abundance (> 0.25-fold, FDR < 1%), significant metabolites denoted by an asterix (*). Bold font is used to indicate those metabolites whose abundance was altered in a similar fashion in the VISA isolate from both series (SG-R and JH2) and subsequently reversed in the revertant, SG-rev, as shown in Figure 4. (PDF) [file pone.0097137.s006.pdf]

Table S1. List and characteristics of the 164 "core" metabolites (including 72 identified) in isolates SG-S, SG-R and SG-rev.

| Name                              | Formula     | Mass     | RT <sup>a</sup> | Mode <sup>b</sup> | FbF/MPE <sup>c</sup> | MM/Std <sup>d</sup> | Abundance |          |          | Standard Deviation |           |          | Standard Error |          |          | p (SG-R versus SG-S)    |                        |     | p (SG-R versus SG-rev)  |                        |     |
|-----------------------------------|-------------|----------|-----------------|-------------------|----------------------|---------------------|-----------|----------|----------|--------------------|-----------|----------|----------------|----------|----------|-------------------------|------------------------|-----|-------------------------|------------------------|-----|
|                                   |             |          |                 |                   |                      |                     | SG-S      | SG-R     | SG-rev   | SG-S               | SG-R      | SG-rev   | SG-S           | SG-R     | SG-rev   | Univariate <sup>e</sup> | Bivariate <sup>f</sup> | SAM | Univariate <sup>e</sup> | Bivariate <sup>f</sup> | SAM |
| Acetylaminobutanol                | C5H11NO2    | 130.0863 | 7.5             | POS               | FbF                  | MM                  | 1         | 0.923484 | 1.074218 | 0.154937           | 0.143972  | 0.352788 | 0.044726       | 0.041561 | 0.101841 |                         |                        |     |                         |                        |     |
| Acetyllysine                      | C9H16N2O3   | 189.1234 | 1.3             | POS               | FbF                  | MM                  | 1         | 1.469279 | 1.038538 | 0.347116           | 0.463426  | 0.57961  | 0.100204       | 1.13378  | 0.167319 | *                       | < 0.01                 | *   | 0.06                    | NS                     | NS  |
| Acetylneuraminic acid             | C13H19NO9   | 310.1133 | 2.5             | POS               | FbF                  | MM                  | 1         | 0.38896  | 0.959795 | 0.156273           | 0.316849  | 0.284569 | 0.045112       | 0.091467 | 0.082148 |                         |                        |     |                         |                        |     |
| Acetylornithine                   | C7H14N2O3   | 175.1077 | 6               | POS               | FbF                  | MM                  | 1         | 0.778985 | 0.876928 | 0.096294           | 0.069078  | 0.129621 | 0.027798       | 0.019941 | 0.037418 | *                       |                        | *   |                         |                        | *   |
| Adenine                           | C5H5N5      | 136.0618 | 6.7             | POS               | FbF                  | MM                  | 1         | 1.06411  | 0.966932 | 0.170441           | 0.218758  | 0.227917 | 0.049202       | 0.06315  | 0.065794 |                         |                        |     |                         |                        |     |
| Adenosine                         | C10H13N5O4  | 268.104  | 5.2             | POS               | FbF                  | MM                  | 1         | 0.771609 | 0.777375 | 0.055643           | 0.069024  | 0.111362 | 0.018949       | 0.019925 | 0.032147 |                         |                        |     |                         |                        | *   |
| Alanine                           | C3H7NO2     | 90.055   | 7.3             | POS               | FbF                  | standard            | 1         | 0.909587 | 0.856267 | 0.091726           | 0.112367  | 0.156352 | 0.026479       | 0.032438 | 0.045187 |                         |                        |     |                         |                        |     |
| Alpha-ketoglutarate               | C5H6O5      | 145.0143 | 1               | NEG               | FbF                  | standard            | 1         | 0.839598 | 1.514367 | 0.233428           | 0.117305  | 0.358671 | 0.066807       | 0.033863 | 0.103539 | *                       |                        | *   |                         |                        | *   |
| Aminocaproate                     | C5H9NO2     | 88.0393  | 6               | POS               | FbF                  | MM                  | 1         | 0.613919 | 0.844481 | 0.222983           | 0.136932  | 0.347323 | 0.066217       | 0.039529 | 0.100264 |                         |                        |     |                         |                        |     |
| Aminoacidate                      | C6H11NO4    | 162.0761 | 6               | POS               | FbF                  | MM                  | 1         | 0.631352 | 0.820226 | 0.295345           | 0.1497671 | 0.631546 | 0.085259       | 0.43234  | 0.182312 |                         | < 0.01                 |     | < 0.01                  | < 0.05                 |     |
| Aminobutyraldehyde                | C4H9NO      | 88.07569 | 2               | POS               | FbF                  | MM                  | 1         | 0.8463   | 1.022939 | 0.174853           | 0.191438  | 0.340486 | 0.050476       | 0.053263 | 0.09829  |                         |                        |     |                         |                        |     |
| Aminocyclopropanoic acid          | C5H8N2O2    | 129.0659 | 7               | POS               | FbF                  | MM                  | 1         | 0.645552 | 0.963332 | 0.166478           | 0.117299  | 0.221023 | 0.048635       | 0.033861 | 0.063804 | *                       |                        | *   |                         |                        | *   |
| Aminocyclopropane carboxylic acid | C4H7NO2     | 102.055  | 6               | POS               | FbF                  | MM                  | 1         | 0.740458 | 0.918946 | 0.195426           | 0.118032  | 0.303059 | 0.056415       | 0.034073 | 0.087486 | *                       |                        | *   |                         |                        | *   |
| Aminobutanolate                   | C4H9NO2     | 104.0706 | 6               | POS               | FbF*                 | standard            | 1         | 0.217881 | 0.854082 | 0.147029           | 0.193553  | 0.117456 | 0.054443       | 0.055874 | 0.033907 |                         | < 0.01                 |     | < 0.01                  | < 0.05                 |     |
| Amino-oxopimelate                 | C7H11NO5    | 190.071  | 2.5             | POS               | FbF                  | MM                  | 1         | 1.052571 | 1.000646 | 0.210538           | 0.232846  | 0.206761 | 0.060777       | 0.067217 | 0.059687 |                         |                        |     |                         |                        |     |
| Anthranilate                      | C7H7NO2     | 138.055  | 7.5             | POS               | FbF                  | MM                  | 1         | 0.721654 | 0.83092  | 0.16143            | 0.229098  | 0.203264 | 0.046601       | 0.066135 | 0.058677 |                         |                        |     |                         |                        |     |
| Arginine                          | C6H14N4O2   | 175.119  | 13              | POS               | FbF                  | standard            | 1         | 0.925981 | 0.805117 | 0.052677           | 0.071807  | 0.156392 | 0.015207       | 0.020729 | 0.045147 |                         |                        |     |                         |                        |     |
| Asparagine                        | C4H8N2O3    | 133.0608 | 8               | POS               | FbF                  | standard            | 1         | 0.935353 | 0.83681  | 0.196112           | 0.167226  | 0.348611 | 0.056613       | 0.048274 | 0.100635 |                         |                        |     |                         |                        |     |
| Aspartate                         | C4H7NO4     | 134.0448 | 5.5             | POS               | FbF                  | standard            | 1         | 0.60656  | 0.782556 | 0.226349           | 0.135593  | 0.376746 | 0.065341       | 0.039142 | 0.108757 |                         |                        | *   |                         |                        | *   |
| Aspartate semialdehyde            | C4H7NO3     | 118.0499 | 1.3             | POS               | FbF                  | MM                  | 1         | 1.839666 | 2.487206 | 0.137784           | 0.480358  | 0.980309 | 0.039775       | 0.138668 | 0.282991 |                         | < 0.01                 |     | NS                      | NS                     |     |
| Carbamoyl aspartate               | C5H8N2O5    | 177.0506 | 1.3             | POS               | FbF                  | MM                  | 1         | 0.787375 | 0.980157 | 0.308004           | 0.175922  | 0.518533 | 0.088913       | 0.050784 | 0.149688 |                         |                        | *   |                         |                        | *   |
| Cis-acetate                       | C6H6O6      | 173.0092 | 1               | NEG               | FbF                  | MM                  | 1         | 1.056753 | 1.473807 | 0.122092           | 0.169239  | 0.356544 | 0.035245       | 0.048855 | 0.102926 |                         |                        |     |                         |                        |     |
| Citrulline                        | C6H13N3O3   | 176.103  | 9               | POS               | FbF                  | standard            | 1         | 1.112778 | 1.265103 | 0.065977           | 0.133414  | 0.081643 | 0.019046       | 0.038513 | 0.023568 |                         |                        | *   | < 0.01                  | < 0.05                 |     |
| d-Ala-d-Ala                       | C6H12N2O3   | 161.0921 | 7               | POS               | FbF                  | MM                  | 1         | 0.865998 | 0.697402 | 0.265306           | 0.224254  | 0.237289 | 0.076876       | 0.064736 | 0.068499 |                         |                        |     |                         |                        |     |
| Deoxyadenosine                    | C10H13N5O3  | 252.1091 | 11              | POS               | FbF                  | MM                  | 1         | 0.397526 | 0.411628 | 0.062861           | 0.314536  | 0.276458 | 0.018147       | 0.090799 | 0.097987 |                         |                        |     |                         |                        |     |
| Fumarate                          | C4H4O4      | 115.0037 | 1.2             | NEG               | FbF                  | standard            | 1         | 0.893414 | 1.273897 | 0.208019           | 0.142593  | 0.310989 | 0.06005        | 0.041163 | 0.089775 |                         |                        | *   | < 0.01                  | < 0.05                 |     |
| Galactonate                       | C6H12O7     | 195.051  | 2.4             | NEG               | FbF                  | MM                  | 1         | 0.864626 | 1.241979 | 0.203403           | 0.185369  | 0.205166 | 0.058717       | 0.035511 | 0.059226 |                         |                        |     | NS                      | NS                     |     |
| Glucose                           | C6H12O6     | 179.0561 | 2.2             | NEG               | FbF                  | standard            | 1         | 1.295632 | 1.42441  | 0.133169           | 0.137177  | 0.281805 | 0.039599       | 0.08135  |          | < 0.01                  | < 0.01                 | *   |                         |                        | *   |
| Glutamate                         | C5H9NO4     | 146.0459 | 6.4             | NEG               | FbF                  | standard            | 1         | 0.95128  | 1.323839 | 0.222281           | 0.166498  | 0.398066 | 0.064167       | 0.048064 | 0.114912 |                         |                        |     |                         |                        |     |
| Glutamine                         | C5H11NO2    | 145.0619 | 8               | NEG               | FbF                  | standard            | 1         | 1.133111 | 1.586426 | 0.370147           | 0.599771  | 0.878739 | 0.106852       | 0.161592 | 0.25367  |                         |                        |     |                         |                        |     |
| Glycerate                         | C3H6O4      | 105.0193 | 2.3             | NEG               | FbF                  | MM                  | 1         | 1.381826 | 1.966643 | 0.320244           | 0.259625  | 0.699394 | 0.092447       | 0.074947 | 0.201898 |                         |                        | *   |                         |                        | *   |
| Glycine                           | C2H5NO2     | 76.0393  | 7               | POS               | FbF                  | standard            | 1         | 1.085894 | 0.815468 | 0.056524           | 0.152026  | 0.143558 | 0.016317       | 0.043886 | 0.041442 |                         |                        |     |                         |                        |     |
| Guanidinobutanate                 | C5H11NO2    | 120.0975 | 6.2             | POS               | FbF                  | MM                  | 1         | 0.944683 | 0.749528 | 0.204608           | 0.220282  | 0.224656 | 0.059065       | 0.06359  | 0.064853 |                         |                        |     |                         |                        |     |
| Guanidinobutanol                  | C5H11NO3    | 146.0924 | 6               | POS               | FbF                  | MM                  | 1         | 0.858653 | 0.917739 | 0.047039           | 0.239627  | 0.166736 | 0.013579       | 0.069174 | 0.048133 |                         |                        |     |                         |                        |     |
| Guanine                           | C5H5N5O     | 152.0567 | 6               | POS               | FbF                  | MM                  | 1         | 0.915869 | 0.906286 | 0.116692           | 0.154992  | 0.155817 | 0.033686       | 0.044742 | 0.044981 |                         |                        |     |                         |                        |     |
| Guanosine                         | C10H13N5O5  | 284.099  | 3               | POS               | FbF                  | MM                  | 1         | 0.652825 | 0.761439 | 0.088464           | 0.07925   | 0.109693 | 0.025537       | 0.022878 | 0.031666 |                         |                        | *   |                         |                        | *   |
| Hexose phosphate                  | C6H13O9P    | 259.0224 | 5.0-6.0         | NEG               | FbF                  | standard            | 1         | 0.465002 | 1.193006 | 0.153405           | 0.222532  | 0.322405 | 0.044284       | 0.06424  | 0.09307  |                         |                        | *   |                         |                        | *   |
| Histidine                         | C6H9N3O2    | 156.0768 | 12              | POS               | FbF                  | standard            | 1         | 1.026585 | 0.777617 | 0.245842           | 0.164832  | 0.265679 | 0.070969       | 0.047583 | 0.076695 |                         |                        |     |                         |                        |     |
| Homovanillin                      | C9H10O3     | 165.0557 | 1               | NEG               | FbF                  | MM                  | 1         | 1.263675 | 1.057825 | 0.377098           | 0.356348  | 0.303722 | 0.108859       | 0.102869 | 0.087677 |                         |                        |     |                         |                        |     |
| Homovanillinate                   | C9H10O4     | 181.0506 | 1.3             | NEG               | FbF                  | MM                  | 1         | 0.670138 | 1.070788 | 0.250429           | 0.109402  | 0.423357 | 0.077293       | 0.031582 | 0.122213 |                         | NS                     | *   | 0.06                    | NS                     |     |
| Hypoxanthine                      | C5H4N4O     | 137.0458 | 2.5             | POS               | FbF                  | MM                  | 1         | 1.073516 | 0.941069 | 0.130912           | 0.203771  | 0.181739 | 0.037791       | 0.058824 | 0.052464 |                         |                        | *   |                         |                        | *   |
| Lactaldehyde                      | C3H6O2      | 73.0295  | 1.3             | NEG               | FbF                  | MM                  | 1         | 0.687728 | 1.311898 | 0.254423           | 0.096284  | 0.457926 | 0.073446       | 0.027795 | 0.132192 |                         |                        | *   |                         |                        | *   |
| Lactate                           | C3H6O3      | 89.02442 | 2.5             | NEG               | FbF                  | standard            | 1         | 1.242906 | 1.296777 | 0.143625           | 0.154184  | 0.287386 | 0.041461       | 0.044509 | 0.082961 |                         | < 0.01                 |     | NS                      | NS                     |     |
| Leucine                           | C6H13NO2    | 132.1019 | 6               | POS               | FbF                  | standard            | 1         | 0.924841 | 1.059153 | 0.115536           | 0.090431  | 0.102209 | 0.033352       | 0.026105 | 0.029505 |                         |                        |     |                         |                        |     |
| Lysine                            | C6H14N2O2   | 147.1128 | 12              | POS               | FbF                  | standard            | 1         | 0.770636 | 0.895513 | 0.29421            | 0.204277  | 0.166971 | 0.084931       | 0.035897 | 0.04482  |                         |                        |     |                         |                        |     |
| Malate                            | C4H6O5      | 133.0143 | 1.3             | NEG               | FbF                  | standard            | 1         | 0.98519  | 1.310312 | 0.177941           | 0.116564  | 0.39376  | 0.051367       | 0.033649 | 0.113669 |                         |                        | *   |                         |                        | *   |
| Methionine                        | C5H11NO2S   | 150.0583 | 5.6             | POS               | FbF                  | MM                  | 1         | 0.773346 | 0.875352 | 0.087942           | 0.090049  | 0.111999 | 0.025387       | 0.025995 | 0.032331 |                         |                        |     |                         |                        |     |
| Methionine oxide                  | C5H11NO3S   | 166.0532 | 9.4             | POS               | FbF                  | MM                  | 1         | 1.072472 | 0.968337 | 0.049095           | 0.099481  | 0.088942 | 0.014173       | 0.028718 | 0.032575 |                         |                        |     |                         |                        |     |
| Methylglyoxal                     | C3H4O2      | 71.01385 | 1.3             | NEG               | FbF                  | MM                  | 1         | 0.343742 | 0.881903 | 0.262406           | 0.499159  | 0.340359 | 0.07575        | 0.144095 | 0.098255 |                         |                        |     |                         |                        |     |
| Methylthioadenosine               | C13H15N5O3S | 298.0968 | 4.5             | POS               | FbF                  | MM                  | 1         | 1.087444 | 0.805587 | 0.061811           | 0.167935  | 0.149906 | 0.017843       | 0.048479 | 0.043274 |                         |                        |     |                         |                        |     |
| Methylthiolate                    | C5H8OS      | 147.0299 | 1.3             | NEG               | FbF                  | MM                  | 1         | 0.485834 | 1.565936 | 0.300271           | 0.17356   | 0.419497 | 0.086681       | 0.05102  | 0.121098 |                         | < 0.01                 | *   | < 0.01                  | < 0.01                 |     |
| Ornithine                         | C5H12N2O2   | 133.0972 | 12              | POS               | FbF                  | standard            | 1         | 1.163482 | 0.796735 | 0.328578           | 0.300087  | 0.295385 | 0.094852       | 0.086628 | 0.08527  |                         |                        |     |                         |                        |     |
| Oxoisocaproic acid                | C6H11O3     | 129.0557 | 6               | NEG               | FbF                  | MM                  | 1         | 1.166124 | 1.706392 | 0.246722           | 0.161477  | 0.334154 | 0.071223       | 0.046614 | 0.096462 |                         |                        |     |                         |                        |     |
| Oxoproline                        | C5H7NO3     | 130.0499 | 1.5             | POS               | FbF                  | MM                  | 1         | 0.866262 | 0.539843 | 0.504622           | 0.798848  | 0.153839 | 0.145672       | 0.230607 |          |                         |                        |     |                         |                        |     |
| Pentose phosphate                 | C5H11O8P    | 229.0119 | 4.3             | NEG               | FbF                  | MM                  | 1         | 0.356736 | 1.37736  | 0.288669           | 0.211981  | 0.572849 | 0.083332       | 0.063503 | 0.165537 |                         | < 0.01                 | *   | < 0.01                  | < 0.01                 |     |
| Phenylalanine                     | C9H9NO2     | 166.0863 | 5.5             | POS               | FbF                  | standard            | 1         | 0.867046 | 0.716365 | 0.151568           | 0.088381  | 0.155846 | 0.043754       | 0.025513 | 0.044989 |                         |                        |     |                         |                        |     |
| Phenylpyruvate                    | C9H8O3      | 163.0401 | 1.2             | NEG               | FbF                  | MM                  | 1         | 0.701159 | 1.459753 | 0.262198           | 0.15677   | 0.370934 | 0.07569        | 0.045256 | 0.107079 |                         |                        |     |                         |                        |     |
| Proline                           | C5H9NO2     | 116.0706 | 8               | POS               | FbF                  | standard            | 1         | 0.801802 | 0.995126 | 0.168488           | 0.107576  | 0.209467 | 0.048638       | 0.031054 | 0.060468 |                         |                        | *   |                         |                        | *   |
| Propanoyl phosphate               | C3H7O5P     | 152.9958 | 2.7             | NEG               | FbF                  | MM                  | 1         | 0.644955 | 0.989407 | 0.117933           | 0.125353  | 0.214964 | 0.034044       | 0.036186 | 0.062055 |                         |                        |     |                         |                        |     |

|                        |            |          |        |     |     |          |   |          |          |          |          |          |          |          |          |    |
|------------------------|------------|----------|--------|-----|-----|----------|---|----------|----------|----------|----------|----------|----------|----------|----------|----|
| Succinic acid          | C4H6O4     | 117.0193 | 1      | NEG | FbF | standard | 1 | 0.664867 | 1.133608 | 0.263923 | 0.102556 | 0.513289 | 0.076188 | 0.029605 | 0.148174 | *  |
| Succinylarginine       | C10H18N4O5 | 275.135  | 9      | POS | FbF | MM       | 1 | 0.809202 | 0.828366 | 0.166337 | 0.106764 | 0.288891 | 0.048017 | 0.03082  | 0.083396 |    |
| Tartronic semialdehyde | C3H4O4     | 103.0037 | 1.2    | NEG | FbF | MM       | 1 | 1.027123 | 1.387024 | 0.134233 | 0.244037 | 0.429901 | 0.03875  | 0.070447 | 0.124102 |    |
| Threonine              | C4H9NO3    | 120.0655 | 6.7    | POS | FbF | MM       | 1 | 1.181481 | 0.886601 | 0.189266 | 0.156777 | 0.201309 | 0.054636 | 0.045258 | 0.058113 |    |
| Tryptophan             | C11H12N2O2 | 205.0972 | 5      | POS | FbF | standard | 1 | 0.824303 | 0.866012 | 0.203908 | 0.114634 | 0.096432 | 0.011988 | 0.033092 | 0.027837 |    |
| Tyramine               | C8H11NO    | 138.0913 | 5.7    | POS | FbF | MM       | 1 | 0.75862  | 0.887078 | 0.062517 | 0.259008 | 0.12814  | 0.018047 | 0.074769 | 0.036991 |    |
| Tyrosine               | C9H11NO3   | 182.0812 | 5.5    | POS | FbF | standard | 1 | 0.680746 | 0.911988 | 0.137991 | 0.107538 | 0.143568 | 0.039834 | 0.031044 | 0.041444 | *  |
| Valine                 | C5H11NO2   | 118.0863 | 6      | POS | FbF | standard | 1 | 0.880527 | 1.100558 | 0.159041 | 0.11347  | 0.231039 | 0.045911 | 0.032756 | 0.066695 |    |
|                        |            | 66.0152  | 12.725 | POS | MFE | NA       | 1 | 0.892013 | 0.977816 | 0.171358 | 0.223031 | 0.244133 | 0.049467 | 0.064389 | 0.070475 |    |
|                        |            | 71.0744  | 6.663  | POS | MFE | NA       | 1 | 0.851316 | 0.902271 | 0.203908 | 0.06992  | 0.222442 | 0.058629 | 0.020184 | 0.064213 | NS |
|                        |            | 83.0377  | 6.434  | POS | MFE | NA       | 1 | 0.735646 | 0.918944 | 0.187495 | 0.227299 | 0.214732 | 0.054125 | 0.065616 | 0.061988 |    |
|                        |            | 83.0738  | 12.352 | POS | MFE | NA       | 1 | 0.804947 | 0.901519 | 0.082864 | 0.076274 | 0.149151 | 0.023921 | 0.022018 | 0.043056 |    |
|                        |            | 85.0529  | 2.094  | POS | MFE | NA       | 1 | 0.975789 | 0.95405  | 0.118569 | 0.151995 | 0.157035 | 0.034228 | 0.043877 | 0.045332 |    |
|                        |            | 85.0896  | 6.106  | POS | MFE | NA       | 1 | 0.873986 | 0.938447 | 0.22579  | 0.208135 | 0.192755 | 0.06518  | 0.060083 | 0.055644 |    |
|                        |            | 89.048   | 7.364  | POS | MFE | NA       | 1 | 0.912598 | 0.860174 | 0.089802 | 0.105881 | 0.158416 | 0.025924 | 0.030479 | 0.045731 |    |
|                        |            | 90.0683  | 2.27   | POS | MFE | NA       | 1 | 0.940628 | 0.914287 | 0.07085  | 0.092803 | 0.123708 | 0.020453 | 0.02679  | 0.035711 |    |
|                        |            | 103.063  | 7.752  | POS | MFE | NA       | 1 | 0.069318 | 0.042194 | 0.152675 | 0.239174 | 0.466065 | 0.044074 | 0.069044 | 0.134541 |    |
|                        |            | 113.0584 | 8.008  | POS | MFE | NA       | 1 | 0.851477 | 0.888303 | 0.154883 | 0.12515  | 0.147738 | 0.044711 | 0.036128 | 0.042648 |    |
|                        |            | 119.0728 | 5.777  | POS | MFE | NA       | 1 | 0.907157 | 0.917748 | 0.061804 | 0.087924 | 0.092363 | 0.017841 | 0.025382 | 0.026663 |    |
|                        |            | 131.0612 | 7.415  | POS | MFE | NA       | 1 | 1.173877 | 1.852636 | 0.29309  | 0.194469 | 0.431541 | 0.084608 | 0.056138 | 0.124575 |    |
|                        |            | 196.1218 | 1.689  | POS | MFE | NA       | 1 | 0.801772 | 0.845062 | 0.061674 | 0.104379 | 0.066485 | 0.017804 | 0.030132 | 0.019193 |    |
|                        |            | 197.0351 | 2.597  | POS | MFE | NA       | 1 | 0.663496 | 0.845054 | 0.18351  | 0.132501 | 0.263977 | 0.052975 | 0.03825  | 0.076204 | NS |
|                        |            | 211.0949 | 2.723  | POS | MFE | NA       | 1 | 0.990226 | 0.843131 | 0.081467 | 0.102704 | 0.107159 | 0.023518 | 0.029648 | 0.030934 |    |
|                        |            | 226.1213 | 1.165  | POS | MFE | NA       | 1 | 0.835555 | 0.861482 | 0.067988 | 0.135534 | 0.091036 | 0.019626 | 0.039125 | 0.02628  |    |
|                        |            | 228.0889 | 1.659  | POS | MFE | NA       | 1 | 0.829954 | 0.873634 | 0.055243 | 0.102778 | 0.058403 | 0.015947 | 0.02967  | 0.01686  |    |
|                        |            | 244.1223 | 1.586  | POS | MFE | NA       | 1 | 0.819177 | 0.841755 | 0.051348 | 0.103415 | 0.073989 | 0.014823 | 0.029853 | 0.021359 |    |
|                        |            | 256.1419 | 9.229  | POS | MFE | NA       | 1 | 0.972181 | 1.113492 | 0.322666 | 0.338237 | 0.616173 | 0.093146 | 0.097641 | 0.177874 |    |
|                        |            | 260.1184 | 1.613  | POS | MFE | NA       | 1 | 0.812918 | 0.883862 | 0.084753 | 0.104356 | 0.091939 | 0.024466 | 0.030125 | 0.02654  |    |
|                        |            | 264.078  | 5.869  | POS | MFE | NA       | 1 | 0.613774 | 0.805991 | 0.032708 | 0.160606 | 0.37801  | 0.0666   | 0.046363 | 0.109122 | NS |
|                        |            | 311.1806 | 1.658  | POS | MFE | NA       | 1 | 0.956538 | 0.835644 | 0.180611 | 0.176806 | 0.153903 | 0.052138 | 0.051039 | 0.044428 |    |
|                        |            | 314.1688 | 1.243  | POS | MFE | NA       | 1 | 0.737119 | 0.897641 | 0.129674 | 0.103877 | 0.201229 | 0.037434 | 0.029987 | 0.05809  |    |
|                        |            | 338.2473 | 1.162  | POS | MFE | NA       | 1 | 0.952889 | 0.854139 | 0.071061 | 0.125627 | 0.106662 | 0.020514 | 0.036265 | 0.030791 |    |
|                        |            | 355.2752 | 1.159  | POS | MFE | NA       | 1 | 0.725599 | 0.753115 | 0.162895 | 0.134057 | 0.110058 | 0.047024 | 0.038699 | 0.031771 | NS |
|                        |            | 382.2741 | 1.185  | POS | MFE | NA       | 1 | 0.933194 | 0.846041 | 0.082697 | 0.122682 | 0.132448 | 0.023872 | 0.035415 | 0.038235 |    |
|                        |            | 384.2392 | 7.234  | POS | MFE | NA       | 1 | 1.041311 | 0.830726 | 0.089804 | 0.13383  | 0.112521 | 0.025924 | 0.038633 | 0.032482 |    |
|                        |            | 385.1935 | 9.263  | POS | MFE | NA       | 1 | 0.695412 | 0.653872 | 0.165334 | 0.142572 | 0.356578 | 0.047728 | 0.041157 | 0.102935 |    |
|                        |            | 397.2809 | 1.144  | POS | MFE | NA       | 1 | 0.855459 | 0.89576  | 0.083766 | 0.190855 | 0.23276  | 0.024181 | 0.055095 | 0.067192 |    |
|                        |            | 399.3012 | 1.178  | POS | MFE | NA       | 1 | 0.74911  | 0.779743 | 0.134055 | 0.107813 | 0.115326 | 0.038698 | 0.031123 | 0.033292 | NS |
|                        |            | 411.2693 | 1.855  | POS | MFE | NA       | 1 | 0.983063 | 0.833168 | 0.618923 | 0.263316 | 0.276262 | 0.178668 | 0.076013 | 0.07975  |    |
|                        |            | 411.7716 | 1.851  | POS | MFE | NA       | 1 | 0.963284 | 0.842071 | 0.113259 | 0.129709 | 0.126854 | 0.032695 | 0.037444 | 0.03662  |    |
|                        |            | 420.2272 | 1.163  | POS | MFE | NA       | 1 | 0.757303 | 0.854127 | 0.293119 | 0.147745 | 0.281789 | 0.084616 | 0.04265  | 0.081345 |    |
|                        |            | 426.2965 | 1.197  | POS | MFE | NA       | 1 | 0.910413 | 0.98383  | 0.105173 | 0.130527 | 0.107329 | 0.030361 | 0.03768  | 0.030983 |    |
|                        |            | 433.2844 | 1.983  | POS | MFE | NA       | 1 | 1.00631  | 0.770418 | 0.147525 | 0.156978 | 0.178088 | 0.042587 | 0.045316 | 0.05141  |    |
|                        |            | 433.7792 | 1.978  | POS | MFE | NA       | 1 | 0.964028 | 0.867782 | 0.135806 | 0.152558 | 0.14158  | 0.039204 | 0.04404  | 0.040871 |    |
|                        |            | 441.2096 | 13.419 | POS | MFE | NA       | 1 | 1.024973 | 0.787284 | 0.071967 | 0.059656 | 0.115815 | 0.020775 | 0.017221 | 0.033433 | NS |
|                        |            | 443.3232 | 1.193  | POS | MFE | NA       | 1 | 0.751712 | 0.799471 | 0.147414 | 0.117901 | 0.126139 | 0.042555 | 0.034035 | 0.036413 | NS |
|                        |            | 455.2826 | 2.121  | POS | MFE | NA       | 1 | 1.241114 | 0.85358  | 0.094031 | 0.206361 | 0.167124 | 0.027145 | 0.059571 | 0.048244 |    |
|                        |            | 460.281  | 12.611 | POS | MFE | NA       | 1 | 1.002274 | 0.870182 | 0.047015 | 0.103697 | 0.081391 | 0.013572 | 0.029935 | 0.023495 |    |
|                        |            | 474.2182 | 6.361  | POS | MFE | NA       | 1 | 1.000998 | 0.899475 | 0.051675 | 0.127973 | 0.081146 | 0.014917 | 0.036943 | 0.023425 |    |
|                        |            | 485.3104 | 2.148  | POS | MFE | NA       | 1 | 0.379258 | 0.837661 | 0.170313 | 0.295155 | 0.156189 | 0.049165 | 0.085204 | 0.045088 | NS |
|                        |            | 485.8201 | 2.347  | POS | MFE | NA       | 1 | 0.890059 | 0.797215 | 0.092132 | 0.099993 | 0.07567  | 0.026596 | 0.028865 | 0.021844 |    |
|                        |            | 486.3167 | 2.335  | POS | MFE | NA       | 1 | 0.160202 | 0.797592 | 0.083896 | 0.115909 | 0.113949 | 0.024219 | 0.03346  | 0.032894 |    |
|                        |            | 487.354  | 1.239  | POS | MFE | NA       | 1 | 0.735629 | 0.793954 | 0.167635 | 0.114204 | 0.168831 | 0.051019 | 0.032968 | 0.048737 | NS |
|                        |            | 524.261  | 3.601  | POS | MFE | NA       | 1 | 1.319172 | 1.147413 | 0.097385 | 0.172321 | 0.211971 | 0.028113 | 0.049719 | 0.061191 |    |
|                        |            | 525.8088 | 12.552 | POS | MFE | NA       | 1 | 1.024177 | 0.817408 | 0.08566  | 0.092469 | 0.090084 | 0.024728 | 0.026693 | 0.026005 |    |
|                        |            | 525.8452 | 2.776  | POS | MFE | NA       | 1 | 1.042416 | 0.762934 | 0.137657 | 0.133327 | 0.140015 | 0.040009 | 0.038488 | 0.040419 | NS |
|                        |            | 531.3806 | 1.456  | POS | MFE | NA       | 1 | 0.719812 | 0.81806  | 0.172723 | 0.148957 | 0.170714 | 0.049861 | 0.043    | 0.049281 |    |
|                        |            | 543.3401 | 3.0852 | POS | MFE | NA       | 1 | 1.150858 | 0.986496 | 0.15969  | 0.175499 | 0.230144 | 0.046099 | 0.05662  | 0.066437 | NS |
|                        |            | 551.8591 | 3.076  | POS | MFE | NA       | 1 | 1.064367 | 0.76996  | 0.129711 | 0.263385 | 0.244075 | 0.037444 | 0.076033 | 0.070458 |    |
|                        |            | 561.814  | 7.62   | POS | MFE | NA       | 1 | 1.04878  | 0.752023 | 0.135454 | 0.130177 | 0.122694 | 0.039102 | 0.037579 | 0.035419 |    |
|                        |            | 567.834  | 12.674 | POS | MFE | NA       | 1 | 0.962908 | 0.726865 | 0.086944 | 0.099617 | 0.120728 | 0.025099 | 0.028757 | 0.034851 |    |
|                        |            | 575.407  | 1.324  | POS | MFE | NA       | 1 | 0.718877 | 0.843331 | 0.18102  | 0.116685 | 0.182791 | 0.052256 | 0.033684 | 0.052767 | NS |
|                        |            | 614.2758 | 10.058 | POS | MFE | NA       | 1 | 1.026208 | 0.89091  | 0.090932 | 0.09461  | 0.102749 | 0.02625  | 0.027312 | 0.029661 |    |
|                        |            | 619.4338 | 1.368  | POS | MFE | NA       | 1 | 0.745046 | 0.860752 | 0.181584 | 0.119625 | 0.166853 | 0.052419 | 0.034533 | 0.048166 | NS |
|                        |            | 707.482  | 1.375  | POS | MFE | NA       | 1 | 0.866596 | 0.872807 | 0.112931 | 0.087009 | 0.097555 | 0.0326   | 0.025117 | 0.028162 |    |
|                        |            | 728.4138 | 1.615  | POS | MFE | NA       | 1 | 0.781489 | 0.870372 | 0.183426 | 0.14586  | 0.178789 | 0.052951 | 0.042106 | 0.051612 |    |
|                        |            | 820.4329 | 2.365  | POS | MFE | NA       | 1 | 1.00274  | 0.865155 | 0.068974 | 0.102395 | 0.096002 | 0.019911 | 0.029559 | 0.027714 |    |
|                        |            | 839.5653 | 1.861  | POS | MFE | NA       | 1 | 0.807551 | 0.814501 | 0.090856 | 0.083813 | 0.094544 | 0.026228 | 0.024195 | 0.027293 |    |
|                        |            | 90.0335  | 1.38   | NEG | MFE | NA       | 1 | 1.021514 | 0.722897 | 0.147867 | 0.14654  | 0.265336 | 0.042686 | 0.042302 | 0.076596 |    |

|    |          |        |     |     |    |   |          |          |          |          |          |          |          |          |        |    |    |    |    |
|----|----------|--------|-----|-----|----|---|----------|----------|----------|----------|----------|----------|----------|----------|--------|----|----|----|----|
| 62 | 146.1082 | 12.327 | NEG | MFE | NA | 1 | 0.973864 | 1.448123 | 0.148837 | 0.122407 | 0.425901 | 0.042966 | 0.035336 | 0.122947 |        |    |    |    |    |
| 63 | 163.0868 | 9.343  | NEG | MFE | NA | 1 | 1.101436 | 1.504103 | 0.248591 | 0.208865 | 0.336754 | 0.071762 | 0.060294 | 0.097213 |        |    |    |    |    |
| 64 | 165.0792 | 5.752  | NEG | MFE | NA | 1 | 1.08872  | 1.401074 | 0.146028 | 0.123362 | 0.226143 | 0.042155 | 0.037344 | 0.065282 |        |    |    |    |    |
| 65 | 174.1149 | 12.335 | NEG | MFE | NA | 1 | 1.153918 | 1.240428 | 0.076583 | 0.074692 | 0.162966 | 0.022108 | 0.021562 | 0.047044 |        |    |    |    |    |
| 66 | 192.031  | 1.365  | NEG | MFE | NA | 1 | 1.141617 | 1.267752 | 0.070298 | 0.085552 | 0.071118 | 0.020293 | 0.024697 | 0.02053  |        |    |    |    |    |
| 67 | 197.0388 | 2.593  | NEG | MFE | NA | 1 | 0.962157 | 1.373168 | 0.203393 | 0.136055 | 0.355784 | 0.039276 | 0.039276 | 0.102706 |        |    |    |    |    |
| 68 | 200.0846 | 1.907  | NEG | MFE | NA | 1 | 1.051335 | 1.53068  | 0.170978 | 0.155582 | 0.223493 | 0.049357 | 0.044913 | 0.064517 |        |    |    |    |    |
| 69 | 216.0402 | 2.665  | NEG | MFE | NA | 1 | 1.364897 | 1.524521 | 0.115818 | 0.135733 | 0.124763 | 0.033434 | 0.044956 | 0.036016 | < 0.05 | NS | NS | NS | NS |
| 70 | 226.0719 | 2.655  | NEG | MFE | NA | 1 | 1.295424 | 1.467279 | 0.128604 | 0.144155 | 0.180562 | 0.037125 | 0.041614 | 0.053124 | < 0.05 | NS | NS | NS | NS |
| 71 | 264.0829 | 5.858  | NEG | MFE | NA | 1 | 0.95     | 1.332495 | 0.199118 | 0.131588 | 0.410739 | 0.05748  | 0.037986 | 0.11857  |        |    |    |    |    |
| 72 | 270.1329 | 0.984  | NEG | MFE | NA | 1 | 1.139882 | 1.438837 | 0.134992 | 0.077963 | 0.164726 | 0.038969 | 0.021062 | 0.047552 |        |    |    |    |    |
| 73 | 278.0441 | 2.661  | NEG | MFE | NA | 1 | 1.447829 | 1.373572 | 0.08563  | 0.218562 | 0.149046 | 0.024719 | 0.063093 | 0.043026 | < 0.01 | NS | NS | NS | NS |
| 74 | 284.1486 | 0.987  | NEG | MFE | NA | 1 | 1.221824 | 1.444242 | 0.140058 | 0.083269 | 0.163413 | 0.040431 | 0.024038 | 0.047173 |        |    |    |    |    |
| 75 | 298.1643 | 1.002  | NEG | MFE | NA | 1 | 1.210572 | 1.51102  | 0.170307 | 0.070378 | 0.191157 | 0.020317 | 0.020317 | 0.055182 |        |    |    |    |    |
| 76 | 310.1623 | 1.024  | NEG | MFE | NA | 1 | 1.063061 | 1.375598 | 0.120753 | 0.095173 | 0.141494 | 0.034859 | 0.027474 | 0.040846 |        |    |    |    |    |
| 77 | 312.1804 | 1.021  | NEG | MFE | NA | 1 | 1.143124 | 1.47922  | 0.152346 | 0.083013 | 0.165476 | 0.043978 | 0.023964 | 0.047769 |        |    |    |    |    |
| 78 | 316.1292 | 1.261  | NEG | MFE | NA | 1 | 1.339512 | 1.443942 | 0.107464 | 0.12642  | 0.169813 | 0.031022 | 0.036494 | 0.049021 | < 0.05 | NS | NS | NS | NS |
| 79 | 324.1785 | 1.035  | NEG | MFE | NA | 1 | 1.143219 | 1.50892  | 0.13453  | 0.098907 | 0.173499 | 0.038835 | 0.028552 | 0.050085 |        |    |    |    |    |
| 80 | 326.1967 | 1.032  | NEG | MFE | NA | 1 | 1.14074  | 1.545177 | 0.162492 | 0.104781 | 0.191662 | 0.046907 | 0.030248 | 0.055328 |        |    |    |    |    |
| 81 | 340.2113 | 1.062  | NEG | MFE | NA | 1 | 1.08631  | 1.52628  | 0.196915 | 0.135167 | 0.214707 | 0.056845 | 0.039019 | 0.061981 |        |    |    |    |    |
| 82 | 354.227  | 1.08   | NEG | MFE | NA | 1 | 1.105397 | 1.603331 | 0.182278 | 0.16275  | 0.234156 | 0.052619 | 0.046982 | 0.067595 |        |    |    |    |    |
| 83 | 368.246  | 1.109  | NEG | MFE | NA | 1 | 1.120895 | 1.566269 | 0.171344 | 0.119813 | 0.212066 | 0.049463 | 0.034587 | 0.061218 |        |    |    |    |    |
| 84 | 388.1328 | 4.38   | NEG | MFE | NA | 1 | 1.262715 | 1.356738 | 0.111865 | 0.217586 | 0.257565 | 0.032293 | 0.062812 | 0.074353 |        |    |    |    |    |
| 85 | 417.1481 | 1.382  | NEG | MFE | NA | 1 | 1.13402  | 1.386612 | 0.069585 | 0.09826  | 0.19569  | 0.020088 | 0.028365 | 0.056491 |        |    |    |    |    |
| 86 | 454.2199 | 2.032  | NEG | MFE | NA | 1 | 1.22595  | 1.536416 | 0.145209 | 0.190304 | 0.21128  | 0.041918 | 0.054936 | 0.060991 |        |    |    |    |    |
| 87 | 474.3011 | 1.306  | NEG | MFE | NA | 1 | 0.738427 | 1.521059 | 0.315137 | 0.223022 | 0.577598 | 0.090972 | 0.064381 | 0.166738 |        |    |    |    |    |
| 88 | 552.1982 | 2.053  | NEG | MFE | NA | 1 | 1.083186 | 1.346662 | 0.091516 | 0.076091 | 0.128447 | 0.028418 | 0.021966 | 0.037079 |        |    |    |    |    |
| 89 | 575.3608 | 12.597 | NEG | MFE | NA | 1 | 1.406711 | 1.411404 | 0.097683 | 0.093743 | 0.12505  | 0.028199 | 0.027061 | 0.036099 | < 0.05 | NS | NS | NS | NS |
| 90 | 726.4559 | 1.627  | NEG | MFE | NA | 1 | 1.342339 | 1.38584  | 0.147084 | 0.158124 | 0.215305 | 0.04246  | 0.045647 | 0.062153 | < 0.05 | NS | NS | NS | NS |
| 91 | 775.3619 | 1.901  | NEG | MFE | NA | 1 | 1.049325 | 1.456682 | 0.166437 | 0.097756 | 0.21319  | 0.048046 | 0.02822  | 0.061543 |        |    |    |    |    |
| 92 | 814.5114 | 1.759  | NEG | MFE | NA | 1 | 1.457814 | 1.286446 | 0.150377 | 0.149674 | 0.189839 | 0.04341  | 0.043207 | 0.054802 | < 0.05 | NS | NS | NS | NS |

<sup>a</sup> Retention Time (RT)

<sup>b</sup> Positive Mode (POS) versus Negative Mode (NEG)

<sup>c</sup> Molecular Feature Extraction (MFE) extracts chromatographic peaks by molecular features versus Find by Formula (FBF) which extracts peaks by chemical formula.

<sup>d</sup> denotes metabolites confirmed by chemical standard (std). All other identifications are provisional identifications made by matching against a database of accurate mass-retention time pairs (mass-matching, MM).

<sup>e</sup> Univariate statistical analysis of changes (> 0.25-fold) in mean intracellular abundance by hierarchical modeling, adjusted by Benjamini-Hochberg procedure.

<sup>f</sup> Bivariate analysis of changes in intracellular abundance and variance by hierarchical modeling, adjusted by Benjamini-Hochberg procedure

Significance Analysis of Microarrays (SAM) analysis of changes in intracellular abundance (> 0.25-fold, FDR < 1%), significant metabolites denoted by an asterisk (\*)

**Bold font** is used to indicate those metabolites whose abundance was altered in a similar fashion in the VSA isolate from both series (SG-R and JH2) and subsequently reversed in the revertant, SG-rev, as shown in Figure 4.
